# Supplementary material for: Sexually transmitted infections among women randomised to depot medroxyprogesterone acetate, a copper intrauterine device or a levonorgestrel implant
Source: PubMed Central journal article supplement (PMC8165154; doi:10.1136/sextrans-2020-054590), 2020-11-18
Supplement: sextrans-2020-054590supp001.pdf [file sextrans-2020-054590supp001.pdf]

## Appendix 1: Table of clinical assessments and findings

|                                 | DMPA-IM<br>n (%) | Copper IUD<br>n (%) | LNG implant<br>n (%) |
|---------------------------------|------------------|---------------------|----------------------|
| <b>Month 3</b>                  |                  |                     |                      |
| Pelvic exams performed          | 357 (14)         | 665 (26)            | 432 (17)             |
| Abdominal/pelvic pain on exam   | 30/357 (8)       | 167/665 (25)        | 54/432 (13)          |
| Discharge observed <sup>a</sup> | 69/357 (19)      | 208/665 (31)        | 103/432 (24)         |
| <b>Month 6</b>                  |                  |                     |                      |
| Pelvic exams performed          | 287 (12)         | 539 (22)            | 355 (14)             |
| Abdominal/pelvic pain on exam   | 36/287 (13)      | 147/539 (27)        | 38/355 (11)          |
| Discharge observed <sup>a</sup> | 57/287 (20)      | 181/539 (34)        | 74/355 (21)          |
| <b>Month 9</b>                  |                  |                     |                      |
| Pelvic exams performed          | 312 (13)         | 495 (20)            | 363 (15)             |
| Abdominal/pelvic pain on exam   | 51/312 (16)      | 131/495 (27)        | 53/363 (15)          |
| Discharge observed <sup>a</sup> | 69/312 (22)      | 199/495 (40)        | 86/363 (24)          |
| <b>Month 12</b>                 |                  |                     |                      |
| Pelvic exams performed          | 481 (21)         | 683 (28)            | 589 (24)             |
| Abdominal/pelvic pain on exam   | 43/481 (9)       | 140/683 (21)        | 43/589 (7)           |
| Discharge observed <sup>a</sup> | 56/481 (12)      | 184/683 (27)        | 101/589 (17)         |
| <b>Month 15</b>                 |                  |                     |                      |
| Pelvic exams performed          | 650 (32)         | 782 (36)            | 721 (33)             |
| Abdominal/pelvic pain on exam   | 40/650 (6)       | 127/782 (16)        | 50/721 (7)           |
| Discharge observed <sup>a</sup> | 66/650 (10)      | 159/782 (20)        | 84/721 (12)          |
| <b>Month 18</b>                 |                  |                     |                      |
| Pelvic exams performed          | 1679 (100)       | 1738 (100)          | 1754 (100)           |
| Abdominal/pelvic pain on exam   | 34/1679 (2)      | 59/1738 (3)         | 30/1754 (2)          |
| Discharge observed <sup>a</sup> | 86/1679 (5)      | 163/1738 (9)        | 104/1754 (6)         |

DMPA-IM=intramuscular depot medroxyprogesterone acetate. IUD=intrauterine device. LNG=levonorgestrel.

<sup>a</sup> Abnormal result showing vaginal discharge, mucopurulent discharge and/or other cervical discharge.
